# Supplementary material
Source: ML conference proceedings conference paper supplement (https://openaccess.thecvf.com/content/WACV2023/html/Tiwari_GarSim_Particle_Based_WACV_2023_paper.html)
Supplement: Supplementary file 1 [file Tiwari_GarSim_Particle_Based_WACV_2023_supplemental.zip]

Archive with 2 entries (2 files):
- 0326-supp.pdf
- output.mp4
